# Supplementary figures and images for: Photothermal Off-Resonance Tapping for Rapid and Gentle Atomic Force Imaging of Live Cells
Source: MDPI journal article supplement (doi:10.3390/ijms19102984), 2018-09-30

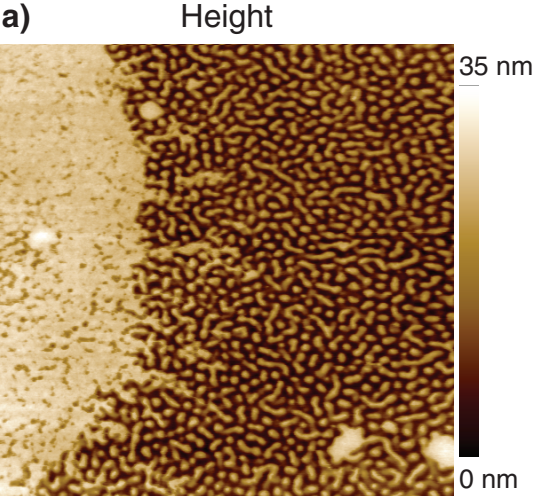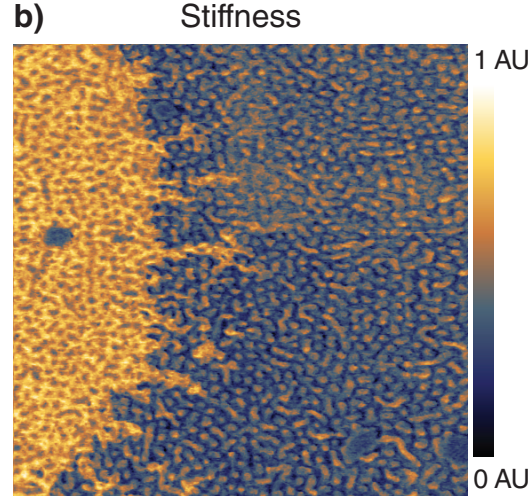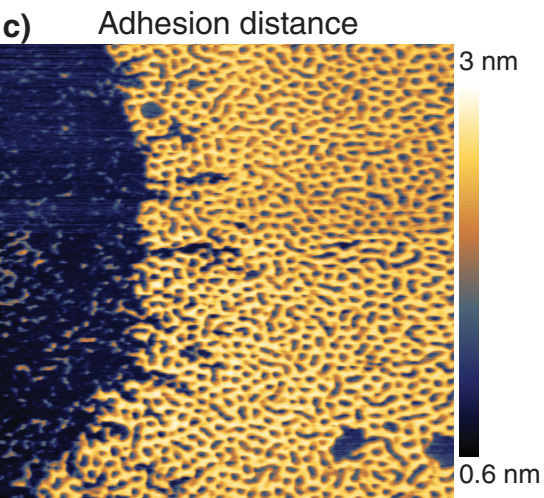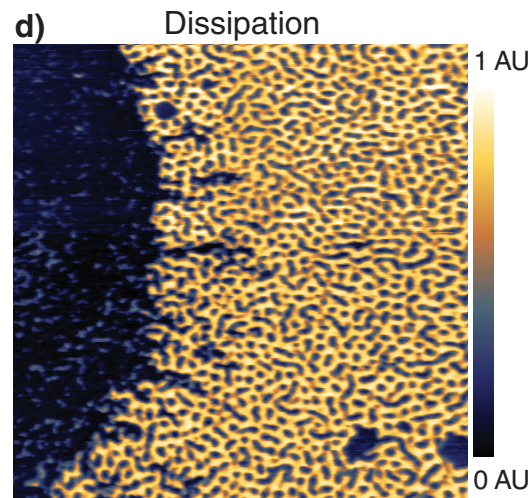

Supplement: s1 [file s1]
